# Supplementary material for: Alien balsams, strawberries and their pollinators in a warmer world
Source: PubMed Central journal article supplement (PMC8556960; doi:10.1186/s12870-021-03282-1), 2021-10-30
Supplement: 12870_2021_3282_MOESM1_ESM.pdf [file 12870_2021_3282_MOESM1_ESM.pdf]

## **Supporting information**

**Title:** Alien balsams, strawberries and their pollinators in a warmer world

**Authors:** Kamil Najberek, Andrzej Kosior, Wojciech Solarz

**Email addresses:** Kamil Najberek [najberek@iop.krakow.pl](mailto:najberek@iop.krakow.pl), Andrzej Kosior [kosior@iop.krakow.pl](mailto:kosior@iop.krakow.pl),  
Wojciech Solarz [solarz@iop.krakow.pl](mailto:solarz@iop.krakow.pl)

## Tables

**Table S1** Pollinators recorded from flowers of cultivated *Fragaria × ananassa*, highly invasive alien *Impatiens glandulifera* and invasive alien species *I. parviflora* in Experiment 1. The table also includes Formicidae, which is known to include nectar thieves.

| Plant species                 | Taxon                           | N records |
|-------------------------------|---------------------------------|-----------|
| <i>Fragaria × ananassa</i>    | Syrphidae                       | 600       |
|                               | Formicidae                      | 69        |
|                               | <i>Episyrphus balteatus</i>     | 24        |
|                               | Apidae                          | 16        |
|                               | <i>Bombus pascuorum</i>         | 11        |
|                               | Muscidae                        | 8         |
|                               | Symphyta                        | 7         |
|                               | Piophilidae                     | 7         |
|                               | <i>Bombus lucorum</i> -complex  | 7         |
|                               | <i>Eupeodes corollae</i>        | 5         |
|                               | <i>Lasioglossum</i>             | 5         |
|                               | Empididae                       | 5         |
|                               | <i>Bombus terrestris</i>        | 3         |
|                               | <i>Apis mellifera</i>           | 3         |
|                               | <i>Psithyrus vestalis</i>       | 2         |
|                               | <i>Bombus humilis</i>           | 2         |
|                               | Tenthredinoidea                 | 2         |
|                               | Chloropidae                     | 1         |
|                               | Syrphini                        | 1         |
|                               | Buprestidae                     | 1         |
|                               | Nematocera                      | 1         |
|                               | Geotrupidae                     | 1         |
|                               | <i>Bombus pratorum</i>          | 1         |
| Chloropidae                   | 1                               |           |
| Calliphoridae                 | 1                               |           |
| <i>Vespula vulgaris</i>       | 1                               |           |
| Vespidae                      | 1                               |           |
|                               | <b>Total number of records:</b> | 786       |
| <i>Impatiens glandulifera</i> | <i>Bombus lucorum</i> -complex  | 1180      |
|                               | <i>Bombus pascuorum</i>         | 485       |
|                               | <i>Bombus terrestris</i>        | 206       |
|                               | <i>Apis mellifera</i>           | 107       |
|                               | <i>Vespula vulgaris</i>         | 15        |
|                               | Apidae                          | 13        |
|                               | Vespidae                        | 11        |
|                               | Syrphidae                       | 4         |
| <i>Panorpa communis</i>       | 1                               |           |
|                               | <b>Total number of records:</b> | 2022      |
| <i>Impatiens parviflora</i>   | Syrphidae                       | 407       |
|                               | Muscidae                        | 6         |
|                               | <i>Episyrphus balteatus</i>     | 5         |
|                               | Apidae                          | 4         |
|                               | Tenthredinoidea                 | 2         |
|                               | <i>Psithyrus vestalis</i>       | 2         |
|                               | Formicidae                      | 2         |
|                               | Drosophilidae                   | 1         |
|                               | Sciaridae                       | 1         |
|                               | <i>Eupeodes corollae</i>        | 1         |
| <i>Lasioglossum</i>           | 1                               |           |
| Calliphoridae                 | 1                               |           |
|                               | <b>Total number of records:</b> | 433       |

**Table S2** Base, candidate and best-fit models in Experiments 1 and 2. The selected best-fit model (bolded) had the lowest corrected Akaike information value AICc.

Models for the number of pollinators ('N pollinators') as a target variable counted per plant individual in particular surveys (Experiment 1).

| Model                                                                                                                                  | AICc value     |
|----------------------------------------------------------------------------------------------------------------------------------------|----------------|
| <u>Base model:</u><br>N pollinators ~ Variant and species + Stem height + N flowers + Temperature + (1 Plants ID) + (1 Time intervals) | 3666.15        |
| <u>Candidate models:</u><br>N pollinators ~ Variant and species + Stem height + Temperature + (1 Plants ID) + (1 Time intervals)       | 3659.16        |
| N pollinators ~ Variant and species + Stem height + N flowers + (1 Plants ID) + (1 Time intervals)                                     | 3655.44        |
| <b>N pollinators ~ Variant and species + Stem height + (1 Plants ID) + (1 Time intervals)</b>                                          | <b>3648.71</b> |

Models for the number of revisits ('N revisits') as a target variable counted during a single pollinator flight (Experiment 2).

| Model                                                                                                                                                                                                 | AIC value      |
|-------------------------------------------------------------------------------------------------------------------------------------------------------------------------------------------------------|----------------|
| <b>2019:</b>                                                                                                                                                                                          |                |
| <u>Base model:</u><br>N re-visits ~ Temperature + Pollinator + Cloud cover + Temperature*Pollinator + (1 Plant ID)                                                                                    | 1977.26        |
| <u>Candidate models:</u><br>N re-visits ~ Temperature + Pollinator + Temperature*Pollinator + (1 Plant ID)                                                                                            | 1978.40        |
| N re-visits ~ Temperature + Pollinator + (1 Plant ID)                                                                                                                                                 | 1976.70        |
| <b>N re-visits ~ Temperature + Pollinator + Cloud cover + (1 Plant ID)</b>                                                                                                                            | <b>1975.20</b> |
| <b>2020:</b>                                                                                                                                                                                          |                |
| <u>Base model:</u><br>N re-visits ~ Temperature + Day time + Pollinator + Gender + Size + Sun radiation + Flower area + Temperature*Pollinator + Temperature*Gender + Temperature*Size + (1 Plant ID) | 3795.56        |
| <u>Candidate models:</u><br>N re-visits ~ Temperature + Day time + Pollinator + Gender + Size + Sun radiation + Flower area + Temperature*Gender + (1 Plant ID)                                       | 3790.88        |
| N re-visits ~ Temperature + Pollinator + Gender + Flower area + Temperature*Gender + (1 Plant ID)                                                                                                     | 3788.38        |
| <b>N re-visits ~ Temperature + Day time + Pollinator + Gender + Flower area + Temperature*Gender + (1 Plant ID)</b>                                                                                   | <b>3787.00</b> |

**Table S3** Stem height of individuals of cultivated *Fragaria × ananassa*, highly invasive alien *Impatiens glandulifera* and invasive alien species *I. parviflora*. Data on the profile area of flowers of *I. glandulifera* (see Fig. S4) are also included.

#### Experiment 1

| Species                       | N individuals | Stem height [cm] |         |         |
|-------------------------------|---------------|------------------|---------|---------|
|                               |               | Minimal          | Maximal | Average |
| <i>Fragaria × ananassa</i>    | 62            | 7                | 28      | 12      |
| <i>Impatiens glandulifera</i> | 42            | 65               | 177     | 149     |
| <i>Impatiens parviflora</i>   | 45            | 20               | 54      | 38      |

#### Experiment 2

| Species                       | N individuals | Stem height [cm] |         |         | Flower area [mm <sup>2</sup> ] |         |         |
|-------------------------------|---------------|------------------|---------|---------|--------------------------------|---------|---------|
|                               |               | Minimal          | Maximal | Average | Minimal                        | Maximal | Average |
| <i>Impatiens glandulifera</i> | 60            | 70               | 182     | 128     | 337                            | 782     | 556     |

**Table S4** GLM model testing factors correlated with an *Impatiens glandulifera* individual being the first to be chosen by visiting bumblebees. The number of first choices for each plant was a target variable, while the stem height, flower size, flower hue and location were fixed effects.

| Effect      | $\chi^2$ | df | p   |
|-------------|----------|----|-----|
| Stem height | 0.84     | 1  | 0.4 |
| Flower area | 0.02     | 1  | 0.9 |
| Flower hue  | 1.73     | 2  | 0.4 |
| Location    | 0.004    | 1  | 0.9 |

**Figures**

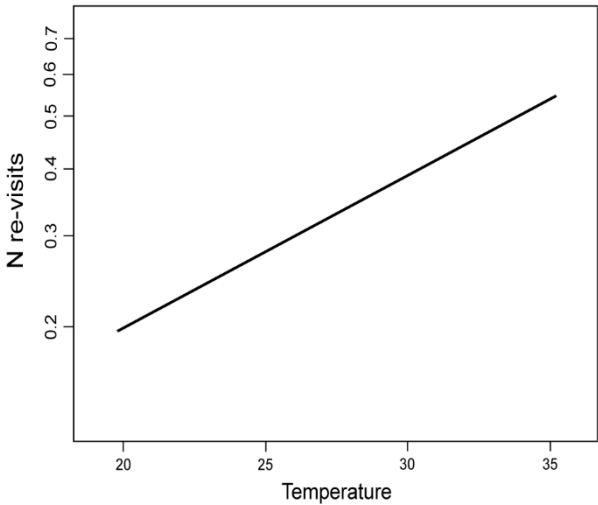

**Fig. S1** Effect of air temperature on the estimated number of revisits of flowers of *Impatiens glandulifera* by bumblebees (*Bombus lucorum complex*, *B. pascuorum* and *B. terrestris*).

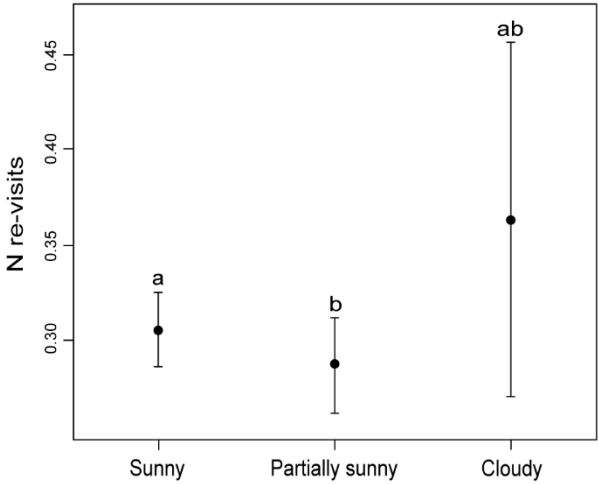

**Fig. S2** Effect of cloudy cover on the mean number of revisits ( $\pm$ SE) of flowers of *Impatiens glandulifera* by bumblebees (*Bombus lucorum complex*, *B. pascuorum* and *B. terrestris*).

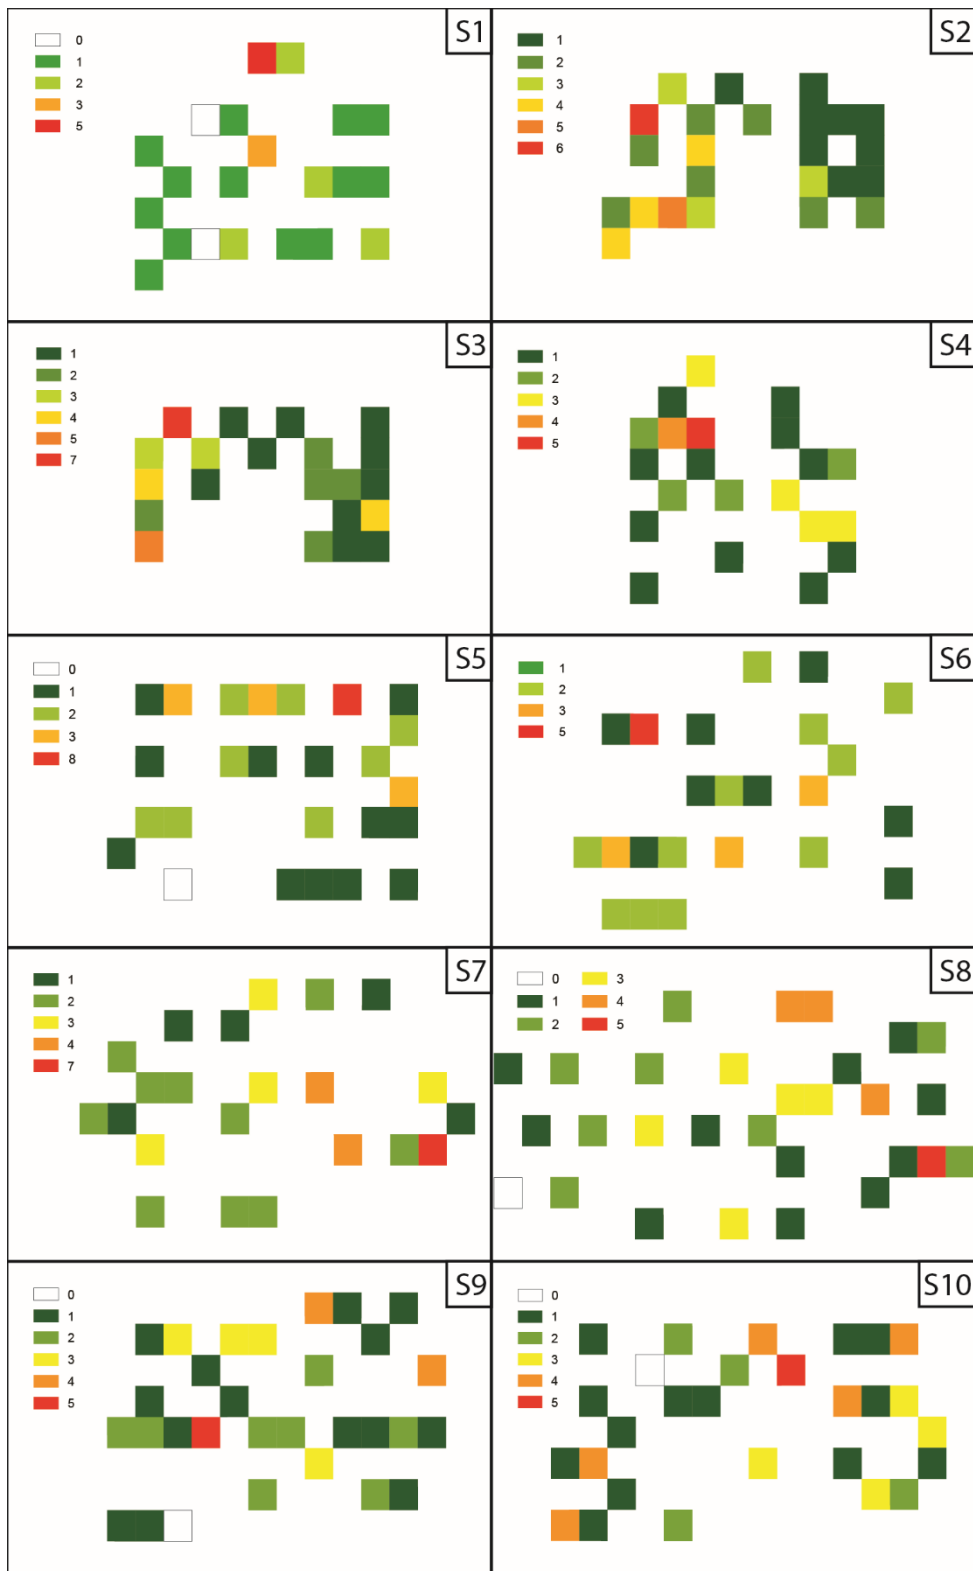

**Fig. S3** Spatial array of *Impatiens glandulifera* individuals chosen by bumblebees as first to be visited.

In each survey (S1-S10), the total number of first visits per particular plant is demonstrated using a colour scale.

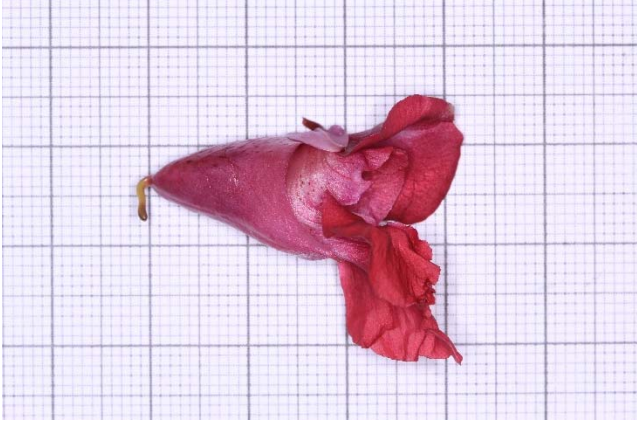

**Fig. S4** Profile of the *Impatiens glandulifera* flower against a millimetre paper.
